# Supplementary material for: A National Survey of Dispensing Practice and Customer Knowledge on Antibiotic Use in Vietnam and the Implications
Source: MDPI journal article supplement (doi:10.3390/antibiotics11081091), 2022-08-12
Supplement: s1 [file s1]

**CODE:**

## STUDY QUESTIONNAIRE (Translated)

|                                                                                                           |           |          |                                     |
|-----------------------------------------------------------------------------------------------------------|-----------|----------|-------------------------------------|
| Province/City:                                                                                            | District: | Commune: | Address:                            |
| Name of drug retail:<br><input type="checkbox"/> Pharmacy: ..... <input type="checkbox"/> Drugstore:..... |           |          | Date of survey<br>...../...../..... |

### PART 1. ANTIBIOTIC PURCHASING BEHAVIOR

|       |                                                                          |                                                                                                                 |          |          |          |          |
|-------|--------------------------------------------------------------------------|-----------------------------------------------------------------------------------------------------------------|----------|----------|----------|----------|
| 1.1.  | Does customer buy <b>drugs</b> with or without prescription?             | <input type="checkbox"/> With prescription <input type="checkbox"/> Without prescription                        |          |          |          |          |
| 1.2   | Does customer buy <b>antibiotics</b> ?                                   | <input type="checkbox"/> Yes <input type="checkbox"/> No                                                        |          |          |          |          |
| 1.2.1 | If yes, with or without prescription?                                    | <input type="checkbox"/> With prescription <input type="checkbox"/> Without prescription                        |          |          |          |          |
| 1.2.2 | In case of buying antibiotics <b>without prescription</b> , the customer | <input type="checkbox"/> Request for specific antibiotics<br><input type="checkbox"/> Describe illness/symptoms |          |          |          |          |
| 1.3   | How many types of antibiotics are purchased?                             | .....                                                                                                           |          |          |          |          |
|       | <b>Antibiotics purchased</b>                                             | <b>1</b>                                                                                                        | <b>2</b> | <b>3</b> | <b>4</b> | <b>5</b> |
| 1.4.  | Drug name - Dosage                                                       |                                                                                                                 |          |          |          |          |
| 1.5.  | Active ingredients                                                       |                                                                                                                 |          |          |          |          |
| 1.5.1 | ATC Code                                                                 |                                                                                                                 |          |          |          |          |
| 15.2. | AWaRE Classification                                                     |                                                                                                                 |          |          |          |          |
| 1.6   | Units ( <i>tablets, vials, ampoules, ...</i> )                           |                                                                                                                 |          |          |          |          |
| 1.7   | Amount                                                                   |                                                                                                                 |          |          |          |          |

### PART 2. ANTIBIOTIC KNOWLEDGE

|     |                                                                                                                                                                                                                                                                                                                                                      |
|-----|------------------------------------------------------------------------------------------------------------------------------------------------------------------------------------------------------------------------------------------------------------------------------------------------------------------------------------------------------|
| 2.1 | For what illness is this antibiotic?.....                                                                                                                                                                                                                                                                                                            |
| 2.2 | According to you, it is illegal for purchasing of antibiotics without a doctor's prescription?<br><input type="checkbox"/> Yes <input type="checkbox"/> No <input type="checkbox"/> Unknown                                                                                                                                                          |
| 2.3 | In the future, do you agree to visit the doctor for having a prescription when purchasing antibiotics at the pharmacy/drugstore?<br><input type="checkbox"/> Agree <input type="checkbox"/> Partly agree <input type="checkbox"/> Disagree <input type="checkbox"/> Not sure                                                                         |
| 2.4 | According to you, normally, how long should antibiotics be taken?<br><input type="checkbox"/> Only for a short time (e.g. 1-2 days), stop using if feeling better<br><input type="checkbox"/> At least five-seven days even if feeling better<br><input type="checkbox"/> Unknown<br><input type="checkbox"/> Other ( <i>please specify</i> ): ..... |

|                                                          |                                                                                                                                                                                                                                                                                                                                                                                                                                                                                                                                                                                                                                                                                                   |
|----------------------------------------------------------|---------------------------------------------------------------------------------------------------------------------------------------------------------------------------------------------------------------------------------------------------------------------------------------------------------------------------------------------------------------------------------------------------------------------------------------------------------------------------------------------------------------------------------------------------------------------------------------------------------------------------------------------------------------------------------------------------|
| 2.5                                                      | According to you, does not taking antibiotics for long enough lead to antibiotic resistance?<br><input type="checkbox"/> Yes <input type="checkbox"/> No <input type="checkbox"/> Unknown                                                                                                                                                                                                                                                                                                                                                                                                                                                                                                         |
| 2.6                                                      | Have you ever known/heard about “antibiotic resistance”?<br><input type="checkbox"/> Unknown <input type="checkbox"/> Yes, <i>please specify</i> .....<br><i>If yes, from what source?</i><br><input type="checkbox"/> Doctor <input type="checkbox"/> Drug seller <input type="checkbox"/> Television, Radio, Newspaper <input type="checkbox"/> Internet <input type="checkbox"/> Other: .....                                                                                                                                                                                                                                                                                                  |
| 2.7                                                      | Is antibiotic resistance a serious problem in the community?<br><input type="checkbox"/> Agree <input type="checkbox"/> Partly agree <input type="checkbox"/> Disagree <input type="checkbox"/> Unknown                                                                                                                                                                                                                                                                                                                                                                                                                                                                                           |
| 2.8                                                      | <i>If a customer buys antibiotics without a prescription, why do you think they go to the pharmacy/drugstore instead of visiting the doctor to get a prescription?</i><br><input type="checkbox"/> Disease or symptoms are mild, not serious<br><input type="checkbox"/> Saving time compared to visiting the doctor<br><input type="checkbox"/> Saving money compared to visiting the doctor<br><input type="checkbox"/> Having personal experience with successfully treating these conditions<br><input type="checkbox"/> Personnel in the drugstore/pharmacy often treats these diseases or symptoms many times beforehand<br><input type="checkbox"/> Other ( <i>please specify</i> ): ..... |
| <b>PART 3. PARTICIPANTS’ DEMOGRAPHIC CHARACTERISTICS</b> |                                                                                                                                                                                                                                                                                                                                                                                                                                                                                                                                                                                                                                                                                                   |
|                                                          | 1. Address:.....<br>2. Age: .....<br>3. Gender: <input type="checkbox"/> Male <input type="checkbox"/> Female<br>4. Educational level: <input type="checkbox"/> ≤ Graduated high school <input type="checkbox"/> College <input type="checkbox"/> University<br>5. Occupation: <input type="checkbox"/> Freelance work <input type="checkbox"/> Others ( <i>please specify</i> ):.....<br><input type="checkbox"/> Office Staff <input type="checkbox"/> Medical Staff                                                                                                                                                                                                                            |
